# Supplementary material for: The ecological genomic basis of salinity adaptation in Tunisian Medicago truncatula
Source: PubMed Central journal article supplement (PMC4410866; doi:10.1186/1471-2164-15-1160), 2014-12-22

**A**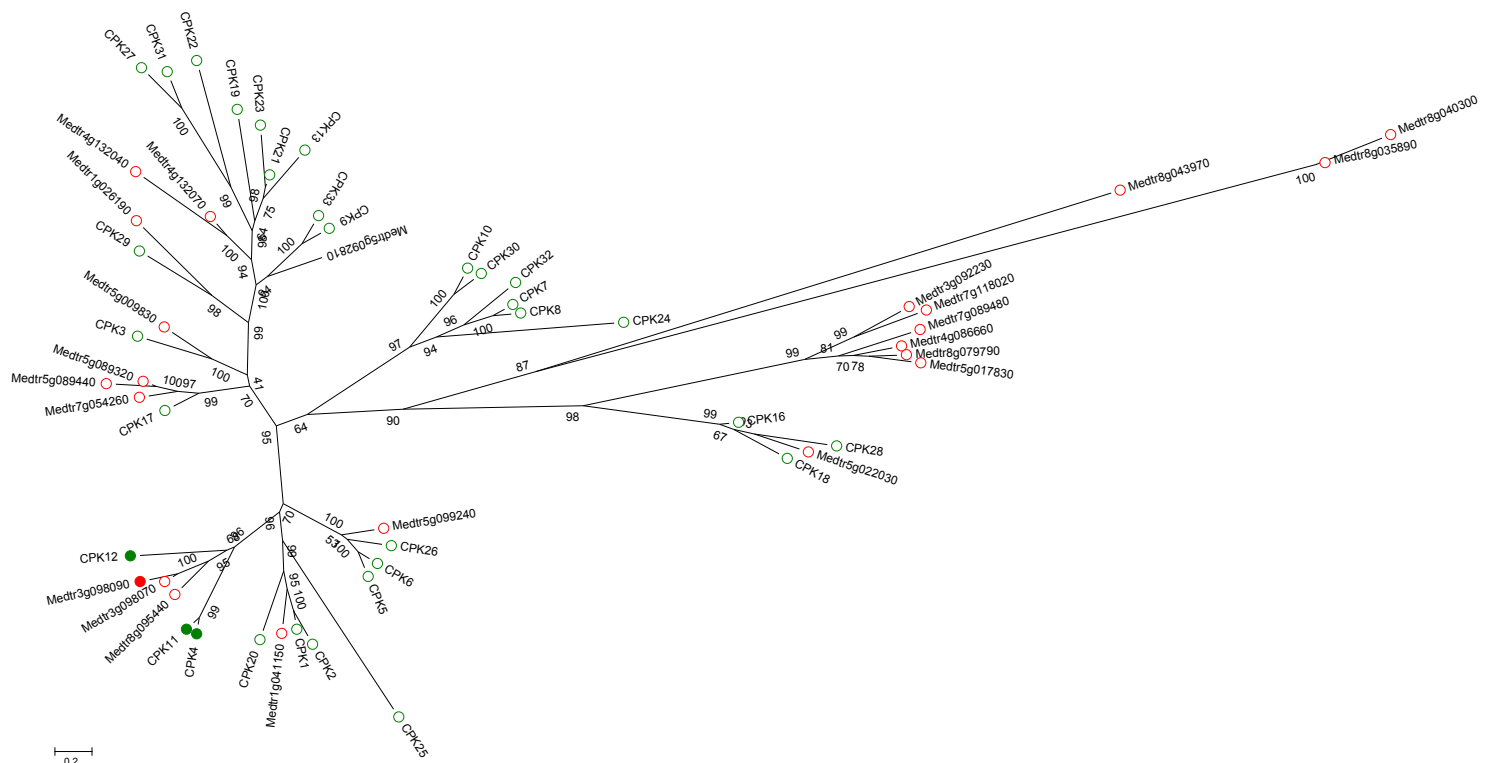**B**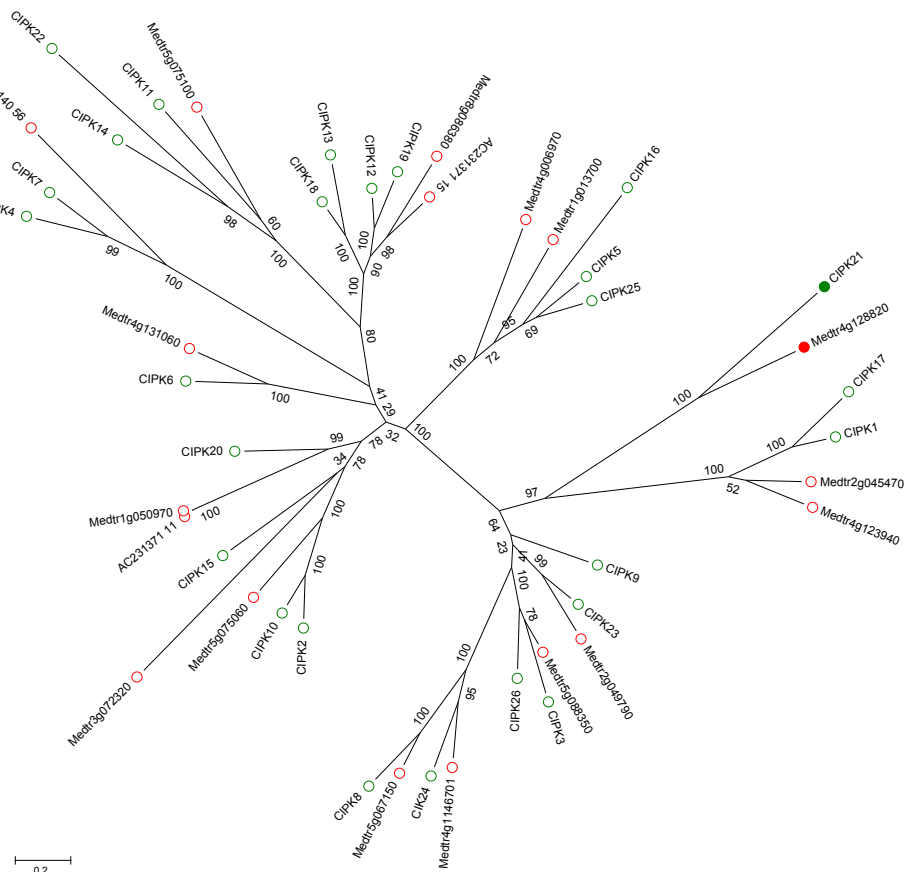

Supplement: 12864_2014_6892_MOESM15_ESM.pdf [file 12864_2014_6892_MOESM15_ESM.pdf]
